# Supplementary material
Source: PubMed Central journal article supplement (PMC3570696)

A

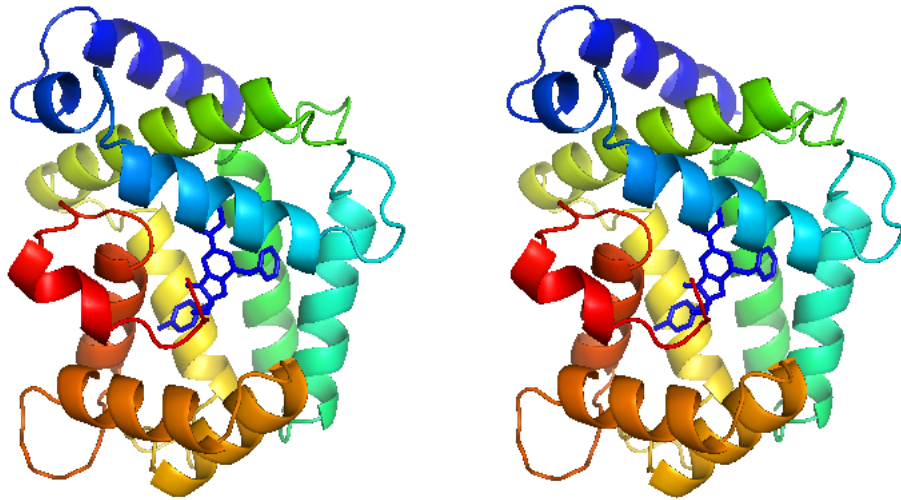

B

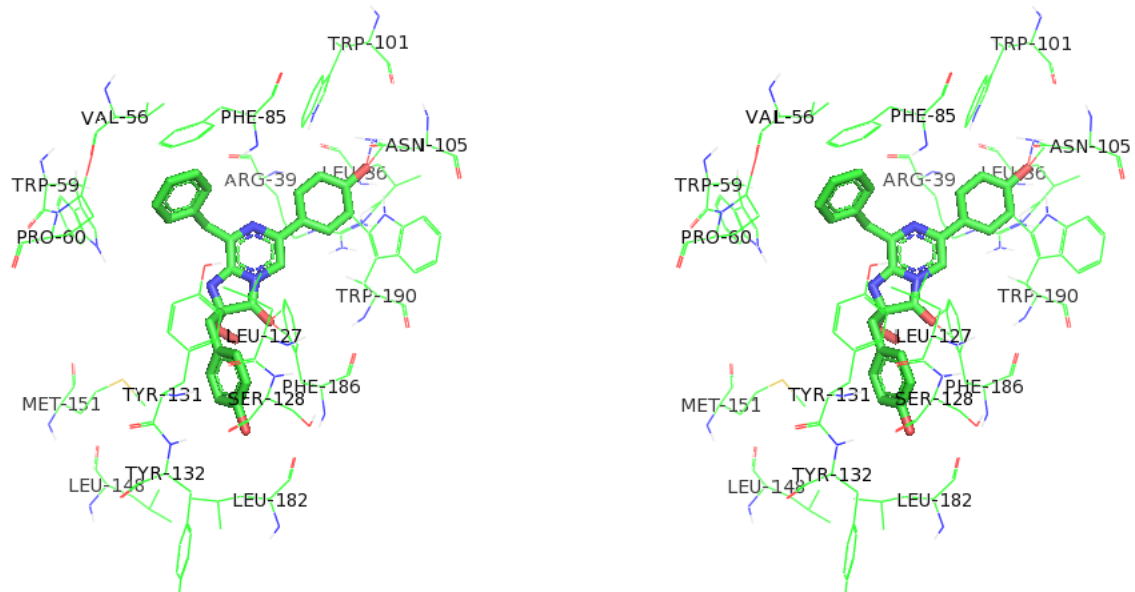

Supplement: NIHMS429630-supplement-01.pdf [file NIHMS429630-supplement-01.pdf]
